# Supplementary material for: SmgGDS antagonizes BPGAP1-induced Ras/ERK activation and neuritogenesis in PC12 cell differentiation
Source: PubMed Central journal article supplement — Mol Biol Cell. 2013 Jan 15;24(2):145–56. doi: 10.1091/mbc.E12-04-0300 (PMC3541961; doi:10.1091/mbc.e12-04-0300), 2013-01-15
Supplement: supp_E12-04-0300v1_CombinedSupMats.pdf [file supp_E12-04-0300v1_CombinedSupMats.pdf]

**Supplementary Figure/Movie 1.** Knockdown of SmgGDS expression augments BCH domain-mediated PC12 cells differentiation. PC12 cells were transfected with BCH and pSilencer -ve ctrl (BCH+neg) (left panel) or BCH and pSilencer rS1 (BCH+rS1) (right panel), made quiescent, subjected to 100 ng/mL EGF stimulation and imaged every 30 minutes for 36 hours. Individual time point images were converted to a movie using ImageJ.
